# Supplementary material for: A Proof of Concept to Bridge the Gap between Mass Spectrometry Imaging, Protein Identification and Relative Quantitation: MSI~LC-MS/MS-LF
Source: Proteomes. 2016 Oct 26;4(4):32. doi: 10.3390/proteomes4040032 (PMC5260965; doi:10.3390/proteomes4040032)
Supplement: Supplementary file 1 [file proteomes-04-00032-s001.xlsx]

## Sheet: Legend
A proof of concept to bridge the Gap between Mass Spectrometry Imaging, Protein Identification and Relative Quantitation: MSI~LC-MS/MS-LF
Laëtitia Théron, Delphine Centeno, Cécile Coudy-Gandilhon, Estelle Pujos Guillot, Thierry Astruc, Didier Rémond, Jean-Claude Barthelemy, Frédéric Roche, Léonard Feasson, Michel Hébraud, Daniel Béchet, Christophe Chambon*
Supplementary Data 1: Table of identified proteins in the 8 individuals within the three conditions: ‘On tissue’, ‘SA-coated’, and ‘Post-MSI’ extractions, and their main cellular compartment.
Legend: The table lists the gene name, the accession number, and the name of proteins. In bold, are represented the proteins with a corresponding peak in MALDI-imaging. For each of the three protein extraction conditions (i.e. 'On-Tissue' in red, 'SA-coated' in yellow, and 'Post-MSI' in blue), are presented the sum of sequence coverage ('ΣCoverage') in percentages, the sum of unique peptides used…
Supplementary Data 2: Classification of proteins according to their main and intermediate cellular compartment.
Legend: The main cellular compartment of each protein was mapped using the Compartement Resource (Binder, J.X.; Pletscher-Frankild, S.; Tsafou, K.; Stolte, C.; O’Donoghue, S.I.; Schneider, R.; Jensen, L.J. Database, 2014, doi: 10.1093/database/bau012); statistical comparison of the mean number of proteins identified within the three extraction procedures.
Supplementary Data 3: Comparison of proteins identified by ‘Tissue homogenate’ proteomic workflow.
Legend: The experiment summary contains the sum of sequence coverage ('ΣCoverage') in percentages, the number of identified proteins in the protein group of a master protein ('Σ# Proteins'), the sum of unique peptides used in the identification ('Σ# Unique Peptides'), the sum of peptides ('Σ# Peptides'), the sum of Peptide Spectrum Match ('Σ# PSMs). Then, for each replicate of each individual, ar…
Supplementary Data 4: Label-free quantitation analysis performed on proteins extracted in situ ‘Post-MSI’ and MALDI-MSI intensities.
Legend: The table presents the individual data of the label-free experiment: the gene name ('Gene name'), the accession number ('Accesion'), and the description of the identified proteins ('Protein name'), the number of peptides used for quantification, the protein score, and the intensities relative to each individual. Then, are represented the theoritical molecular weight (kDa), the molecular w…

## Sheet: SuppData1
			On-Tissue'					SA-Coated'					Post-MSI'					On-Tissue'	SA-coated'	Post-MSI	Main Cellular Component
Gene name	Accession number	Protein name	ΣCoverage	Σ# Unique Peptides	Σ# Peptides	Σ# PSMs	% PSMs	ΣCoverage	Σ# Unique Peptides	Σ# Peptides	Σ# PSMs	% PSMs	ΣCoverage	Σ# Unique Peptides	Σ# Peptides	Σ# PSMs	% PSMs	#	#	#
CKM	P06732	Creatine kinase M-type	41.47	15	15	722	37.0067	33.33	10	10	291	11.3939	30.18	9	9	53	3.29397	1	1	1	Cytosol
TPI1	P60174-1	Isoform 2 of Triosephosphate isomerase	64.26	13	13	205	10.5074	26.91	5	5	32	1.25294	7.19	1	1	4	0.248602	1	1	1	Cytosol
MYL1	P05976	Myosin light chain 1/3, skeletal muscle isoform	44.67	7	7	114	5.84316	38.67	6	6	172	6.73453	56.19	8	10	30	1.86451	1	1	1	Cytoskeleton
CA3	P07451	Carbonic anhydrase 3	45.38	8	8	111	5.68939	17.69	3	3	38	1.48786	10.38	2	2	10	0.621504	1	1	1	Cytosol
MB	B0QYF8	Myoglobin (Fragment)	65.73	7	7	92	4.71553	65.73	7	7	119	4.65936	30.77	5	5	59	3.66687	1	1	1	Cytosol
MYH2	Q9UKX2	Myosin-2	19.84	8	28	86	4.408	29.62	16	44	211	8.26155	29.01	12	48	254	15.7862	1	1	1	Cytoskeleton
ACTA1	P68133	Actin, alpha skeletal muscle	26.79	7	7	84	4.30548	26.79	4	7	77	3.01488	27.19	8	8	55	3.41827	1	1	1	Cytoskeleton
MYH1	P12882	Myosin-1	17.12	5	24	68	3.48539	22.18	5	33	162	6.34299	24.55	6	42	227	14.1081	1	1	1	Cytoskeleton
ENO3	P06733	Enolase (Fragment)	23.15	6	6	68	3.48539	15.9	3	3	29	1.13547	19.79	4	4	18	1.11871	1	1	1	Cytosol
MYH7	P12883	Myosin-7	14.52	14	21	63	3.22911	24.75	26	37	189	7.40016	34.73	40	56	286	17.775	1	1	1	Cytoskeleton
MYH4	Q9Y623	Myosin-4	10.16	1	15	46	2.35777	5.16	1	8	43	1.68363	13.14	2	2	3	0.186451	1	1	1	Cytoskeleton
TPM2	P07951	Tropomyosin beta chain	22.54	3	6	34	1.7427	34.15	6	11	256	10.0235	35.21	7	12	95	5.90429	1	1	1	Cytoskeleton
PGM1	P36871	Phosphoglucomutase-1	15.66	6	6	29	1.48642	4.38	1	1	2	0.0783085						1	1	0	Cytosol
PYGM	P11217-2	Isoform 2 of Glycogen phosphorylase, muscle form	9.02	5	5	27	1.38391	11.14	6	6	13	0.509005	5.17	2	2	2	0.124301	1	1	1	Cytosol
MYL3	P08590	Myosin light chain 3	18.97	3	3	23	1.17888	38.46	6	6	63	2.46672	44.1	6	8	30	1.86451	1	1	1	Cytoskeleton
HBB	P68871	Hemoglobin subunit beta	46.94	5	5	22	1.12763	70.75	5	8	114	4.46359	44.9	3	5	33	2.05096	1	1	1	Extracellular space
GAPDH	P04406	Glyceraldehyde-3-phosphate dehydrogenase	19.45	4	4	19	0.97386	14.33	3	3	37	1.44871	5.38	1	1	2	0.124301	1	1	1	Cytosol
TPM1	P09493-H0YK20	Tropomyosin alpha-1 chain (and H0YK20 (Fragment))	19.25	2	5	15	0.768836	35.92	2	12	154	6.02976	42.61	3	13	84	5.22063	1	1	1	Cytoskeleton
MYLPF	Q96A32	Myosin regulatory light chain 2, skeletal muscle isoform	17.75	3	3	11	0.563813	39.26	4	4	40	1.56617	27.12	3	3	11	0.683654	1	1	1	Cytoskeleton
FABP3	P05413	Fatty acid-binding protein, heart	17.29	2	2	10	0.512558	9.77	1	1	1	0.0391543	7.52	1	1	1	0.0621504	1	1	1	Cytosol
HSPB7	C9J5A3-E9PN25	Heat shock protein beta-7 (and E9PN255(Fragment))	10.48	1	1	9	0.461302	10.48	1	1	8	0.313234	19.7	2	2	2	0.124301	1	1	1	Nucleus
PGK1	B7Z7A9	Phosphoglycerate kinase	4.37	1	1	9	0.461302											1	0	0	Cytosol
TNNC2	P02585	Troponin C, skeletal muscle	28.13	3	3	7	0.35879	33.13	4	4	24	0.939702	11.72	1	1	7	0.435053	1	1	1	Cytoskeleton
PEBP1	P30086	Phosphatidylethanolamine-binding protein 1	10.7	1	1	7	0.35879	10.7	1	1	8	0.313234	18.18	2	2	4	0.248602	1	1	1	Cytosol
ACTN2	P35609	Alpha-actinin-2	4	2	3	6	0.307535	7.05	5	5	21	0.82224	13.09	10	10	22	1.36731	1	1	1	Cytoskeleton
PGAM2	P15259	Phosphoglycerate mutase 2	9.88	2	2	6	0.307535	10.28	2	2	3	0.117463	4.35	1	1	1	0.0621504	1	1	1	Cytosol
HBA1	P69905	Hemoglobin subunit alpha	19.01	2	2	5	0.256279	36.62	4	4	54	2.11433	19.01	2	2	9	0.559354	1	1	1	Extracellular space
TXN	P10599-2	Isoform 2 of Thioredoxin	15.29	1	1	5	0.256279	15.29	1	1	2	0.0783085	15.29	1	1	3	0.186451	1	1	1	Cytosol
FHL1	Q5JXI0	Four and a half LIM domains protein 1 (Fragment)	10.51	2	2	4	0.205023	7.14	2	2	14	0.54816	8.51	1	1	13	0.807955	1	1	1	Nucleus
S100A1	P23297	Protein S100-A1	15.96	1	1	3	0.153767	15.96	1	1	5	0.195771						1	1	0	Endoplasmic reticulum
ATP5B	P06576	ATP synthase subunit beta, mitochondrial (Fragment)	5.02	1	1	3	0.153767	16.6	3	3	4	0.156617	5.79	1	1	2	0.124301	1	1	1	Plasma membrane
ALB	P02768	Serum albumin	6.71	3	3	3	0.153767	2.64	1	1	4	0.156617						1	1	0	Extracellular space
IFIT2	P09913	Interferon-induced protein with tetratricopeptide repeats 2	2.54	1	1	3	0.153767	2.54	1	1	1	0.0391543						1	1	0	Endoplasmic reticulum
SOD2	B4E3K9-H7BYH4	Superoxide dismutase (and H7BYH4 fragment)	17.28	2	2	3	0.153767						24.59	1	1	2	0.124301	1	0	1	Mitochondrion
TPM3	P06753	Tropomyosin alpha-3 chain	23.16	1	2	2	0.102512	39.79	3	13	112	4.38528	41.9	3	12	69	4.28838	1	1	1	Cytoskeleton
HSPB1	P04792	Heat shock protein beta-1	13.17	2	2	2	0.102512	18.05	3	3	15	0.587314	5.38	1	1	2	0.124301	1	1	1	Nucleus
ALDOA	P04075-H3BR68	Fructose-bisphosphate aldolase A (and H3BR68(fragment))	9.03	1	1	2	0.102512	15.38	4	4	12	0.469851	28.57	7	5	32	1.98881	1	1	1	Cytosol
IDH2	B4DFL2	Isocitrate dehydrogenase [NADP]	4.25	1	1	2	0.102512	7.5	2	2	4	0.156617						1	1	0	Mitochondrion
DES	P17661	Desmin	2.98	1	1	2	0.102512	6.17	2	2	2	0.0783085	11.7	5	5	7	0.435053	1	1	1	Cytoskeleton
OR2T35	Q8NGX2	Olfactory receptor 2T35	2.48	1	1	2	0.102512	2.48	1	1	2	0.0783085	2.48	1	1	1	0.0621504	1	1	1	Plasma membrane
AKR1B15	C9JRZ8-2	Isoform 2 of Aldo-keto reductase family 1 member B15	2.53	1	1	2	0.102512											1	0	0	Cytosol
HEBP2	Q9Y5Z4-2	Isoform 2 of Heme-binding protein 2	7.07	1	1	2	0.102512											1	0	0	Mitochondrion
TNNT3	C9JCA5	Troponin T, fast skeletal muscle (Fragment)	7.21	1	1	1	0.0512558	28.37	3	4	23	0.900548	17.79	2	3	15	0.932256	1	1	1	Cytoskeleton
LDB3	O75112-6	Isoform 6 of LIM domain-binding protein 3	4.95	1	1	1	0.0512558	10.6	2	2	15	0.587314	10.6	2	2	16	0.994406	1	1	1	Cytoskeleton
TNNI2	P48788	Troponin I, fast skeletal muscle	7.14	1	1	1	0.0512558	9.34	2	2	13	0.509005	14.84	2	2	13	0.807955	1	1	1	Cytoskeleton
ALDOC	P009972	Fructose-bisphosphate aldolase C (Fragment)	17.04	1	1	1	0.0512558	17.04	1	1	10	0.391543	17.04	1	1	1	0.0621504	1	1	1	Cytosol
PKM	H3BQ34	Pyruvate kinase	4.63	1	1	1	0.0512558	11.11	4	4	7	0.27408	7.17	3	3	7	0.435053	1	1	1	Cytosol
MYBPC1	G3V1V7	Myosin binding protein C, slow type, isoform CRA_e	1.07	1	1	1	0.0512558	5.98	5	5	6	0.234926	4.39	3	3	3	0.186451	1	1	1	Cytosol
LDHA	P00338-4	Isoform 4 of L-lactate dehydrogenase A chain	20.83	1	1	1	0.0512558	20.83	1	1	4	0.156617	3.65	1	1	1	0.0621504	1	1	1	Cytosol
TTN	Q8WZ42	Titin (Fragment)	0.21	1	1	1	0.0512558	0.19	3	3	3	0.117463	0.63	15	15	21	1.30516	1	1	1	Cytoskeleton
NEB	F8WCL5	Nebulin	0.7	1	1	1	0.0512558	0.49	1	1	1	0.0391543	1.45	3	3	3	0.186451	1	1	1	Cytoskeleton
KIDINS220	Q9ULH0-3	Isoform 3 of Kinase D-interacting substrate of 220 kDa	1.55	1	1	1	0.0512558	1.55	1	1	1	0.0391543						1	1	0	Plasma membrane
COX5A	H3BRM5	Cytochrome c oxidase subunit 5A, mitochondrial	13.04	1	1	1	0.0512558						13.04	1	1	1	0.0621504	1	0	1	Mitochondrion
GSTP1	A8MX94	Glutathione S-transferase P	9.2	1	1	1	0.0512558											1	0	0	Cytosol
XPC	Q01831-2	Isoform 2 of DNA repair protein complementing XP-C cells	0.78	1	1	1	0.0512558											1	0	0	Nucleus
TPM3	Q5VU72	Tropomyosin 3, isoform CRA_a						29.03	1	8	86	3.36727	20.24	1	6	46	2.85892	0	1	1	Cytoskeleton
TNNC1	P63316	Troponin C, slow skeletal and cardiac muscles						22.98	3	3	8	0.313234	28.57	4	4	11	0.683654	0	1	1	Cytoskeleton
MYOZ1	Q9NP98	Myozenin-1						15.38	3	3	8	0.313234	17.39	3	3	4	0.248602	0	1	1	Nucleus
TNNI1	P19237	Troponin I, slow skeletal muscle						11.43	1	1	7	0.27408	17.11	4	4	12	0.745805	0	1	1	Cytoskeleton
CRYAB	E9PR44-E9PNH7	Alpha-crystallin B chain (and E9PNH7(Fragment))						31.61	4	4	6	0.234926	17.92	2	2	6	0.372902	0	1	1	Nucleus
HIST1H1T	P22492	Histone H1t						5.31	1	1	3	0.117463	5.31	1	1	2	0.124301	0	1	1	Nucleus
CSRP3	P50461	Cysteine and glycine-rich protein 3						9.28	1	1	3	0.117463						0	1	0	Cytosol
KIF15	Q9NS87-3	Isoform 3 of Kinesin-like protein KIF15						2.29	1	1	3	0.117463						0	1	0	Cytosol
CASQ1	P31415	Calsequestrin-1						3.28	1	1	2	0.0783085						0	1	0	Mitochondrion
USMG5	Q96IX5	Up-regulated during skeletal muscle growth protein 5						25.86	1	1	2	0.0783085						0	1	0	Mitochondrion
FLNC	Q14315-2	Isoform 2 of Filamin-C						0.48	1	1	1	0.0391543	1.34	3	3	4	0.248602	0	1	1	Cytosol
ATP2A1	B3KY17	Sarcoplasmic/endoplasmic reticulum calcium ATPase 1						1.73	1	1	1	0.0391543	2.88	2	2	4	0.248602	0	1	1	Plasma membrane
PFKM	P08237	6-phosphofructokinase, muscle type (Fragment)						1.74	1	1	1	0.0391543	22.35	1	1	1	0.0621504	0	1	1	Cytosol
COL1A2	P08123	Collagen alpha-2(I) chain						1.02	1	1	1	0.0391543	1.32	1	1	1	0.0621504	0	1	1	Extracellular space
H2AFV	A8MQC5	Histone H2A						13.64	1	1	1	0.0391543	11.9	1	1	1	0.0621504	0	1	1	Nucleus
UBB	J3QSA3	Ubiquitin (Fragment)												1	1	2	0.124301	0	0	1	Nucleus
UQCRB	P14927	Cytochrome b-c1 complex subunit 7												1	1	1	0.0621504	0	0	1	Mitochondrion

## Sheet: SuppData2
Supplementary Data 2: Classification of proteins according to their main and intermediate cellular compartment.
		On Tissue	SA-coated	Post-MSI
Cytosol		20	22	18
Cytoskeleton		19	22	22
Nucleus		4	7	8
Mitochondrion		4	3	3
Plasma membrane		3	3	3
Extracelular space		3	4	3
Endoplasmic reticulum		2	2
khi deux test: 'On Tissue' vs 'SA-coated'				0.872922
khi deux test: 'SA-coated' vs 'Post-MSI'				0.96899
khi deux test: 'On Tissue' vs 'Post-MSI'				0.813271
Cytosol
		Number of proteins
		On Tissue	20
		SA-coated	22
		Post-IMS	18
Extracellular space
		Number of proteins
		On Tissue	3
		SA-coated	4
		Post-IMS	3
Cytoskeleton
		Number of proteins
		On Tissue	19
		SA-coated	22
		Post-IMS	22
Endoplasmic reticulum / Cytosol
		Number of proteins
		On Tissue	2
		SA-coated	2
		Post-IMS	0
Nucleus
		Number of proteins
		On Tissue	4
		SA-coated	7
		Post-IMS	8
Plasma membrane
		Number of proteins
		On Tissue	3
		SA-coated	4
		Post-IMS	3
Mitochondrion
		Number of proteins
		On Tissue	4
		SA-coated	3
		Post-IMS	3
INTERMEDIATE CELLULAR COMPARTMENT
Extracellular space / Cytoskeleton
		Number of proteins
		On Tissue	2
		SA-coated	2
		Post-IMS	2
Cytoskeleton / Cytosol
		Number of proteins
		On Tissue	11
		SA-coated	14
		Post-IMS	11
Extracellular space / Cytosol
		Number of proteins
		On Tissue	3
		SA-coated	3
		Post-IMS	1
Nucleus / Cytosol
		Number of proteins
		On Tissue	6
		SA-coated	6
		Post-IMS	7
Plasma membrane / Cytosol
		Number of proteins
		On Tissue	1
		SA-coated	1
		Post-IMS	1
Mitochondrion / Cytosol
		Number of proteins
		On Tissue	1
		SA-coated	1
		Post-IMS	0
Mitochondrion / Plasma membrane
		Number of proteins
		On Tissue	1
		SA-coated	1
		Post-IMS	1
	Nucleus / Endoplasmic reticulum
		Number of proteins
		On Tissue	1
		SA-coated	1
		Post-IMS	0

## Sheet: SuppData3
		Experiment summary					Individual 1 _ replicate 1				Individual 1 _ replicate 2				Individual 2 _ replicate 1				Individual 2 _ replicate 2				Individual 3 _ replicate 1				Individual 3 _ replicate 2				Individual 4 _ replicate 1				Individual 4 _ replicate 2				Individual 5 _ replicate 1				Individual 5 _ replicate 2				Individual 6 _ replicate 1
Accession	Description	ΣCoverage	Σ# Proteins	Σ# Unique Peptides	Σ# Peptides	Σ# PSMs	Score	Coverage	# Peptides	# PSM	Score	Coverage	# Peptides	# PSM	Score	Coverage	# Peptides	# PSM	Score	Coverage	# Peptides	# PSM	Score	Coverage	# Peptides	# PSM	Score	Coverage	# Peptides	# PSM	Score	Coverage	# Peptides	# PSM	Score	Coverage	# Peptides	# PSM	Score	Coverage	# Peptides	# PSM	Score	Coverage	# Peptides	# PSM	Score	Coverage	# Peptides
K7EIT4	14-3-3 protein epsilon (Fragment)	22.94	3	2	2	7									193.124	22.94	2	4	52.01	11.01	1	1		0			83.98	11.01	1	1		0			48.01	11.01	1	1
P61981	14-3-3 protein gamma	5.67	1	1	1	3		0								0											70.38	5.67	1	1	43.41	5.67	1	1		0				0				0			61.71	5.67	1
E9PFG7	2-oxoglutarate dehydrogenase, mitochondrial	1.37	6	1	1	2						0			83.434	1.37	1	2																						0
B4E2W0	3-ketoacyl-CoA thiolase	5.09	3	2	2	2										0				0			78.7326	5.09	2	2										0				0
P24752	Acetyl-CoA acetyltransferase, mitochondrial	11.24	4	3	3	6						0			136.054	3.98	1	2		0				0			46.69	4.22	1	1	46.39	3.98	1	1		0				0			44.51	3.04	1	1		0
Q99798	Aconitate hydratase, mitochondrial	5.9	2	3	3	6									102.014	3.97	2	2					50.02	1.92	1	1	73.19	2.05	1	1		0			44.68	2.05	1	1		0				0			44.9	2.05	1
P68133	Actin, alpha skeletal muscle	69.76	2	11	20	781	1288.88	37.4	12	33	1101.21	35.28	11	29	5106.99	47.75	14	120	2276.41	45.09	12	58	3204.65	50.13	15	82	3001.57	51.46	14	71	2044.29	49.34	13	51	2250	48.81	14	57	1924.92	41.38	12	50	1446.35	38.46	11	38	1601.5	49.34	13
P60709	Actin, cytoplasmic 1	34.93	2	2	11	348		0				0			1783.09	23.73	8	51		0				0				0				0			764.915	24.8	7	21		0				0				0
P00568	Adenylate kinase isoenzyme 1	41.75	4	6	6	20		0			48.7	7.22	1	1	149.761	11.86	2	3	53.04	6.19	1	1	49.16	7.22	1	1		0			85.1126	7.22	1	2	113.114	24.23	3	3	43.77	7.22	1	1	142.409	13.92	2	4		0
Q8N142	Adenylosuccinate synthetase isozyme 1	15.1	2	5	5	9									171.142	5.47	2	4					45.14	2.41	1	1	83.3009	4.6	1	2					81.3056	5.03	2	2		0
V9GYG0	ADP/ATP translocase 1	29.33	6	4	4	13		0			78.88	6.25	1	1	66.65	6.25	1	1					79.92	6.25	1	1	86.46	6.25	1	1					47.72	6.25	1	1	101.546	19.23	2	2	183.979	12.02	2	4	62.91	4.33	1
P15121	Aldose reductase	9.18	5	2	2	3		0				0			157.325	9.18	2	3										0																0				0
P35609	Alpha-actinin-2	55.26	2	32	41	530	771.874	21.03	14	18	794.809	18.23	12	18	3119.19	41.5	27	69	1878.01	26.96	18	45	2428.1	46.87	32	61	2172.84	38.93	27	53	1792.98	39.37	25	47	1860.95	36.13	24	44	1131.98	27.4	19	27	811.407	25.62	16	23	667.518	18.9	12
Q08043	Alpha-actinin-3	28.86	1	11	20	220	344.884	12.21	8	9	304.488	5.66	4	7	1620.71	25.08	17	35	749.147	12.54	9	19	973.574	14.43	10	26	869.679	14.87	11	22		0				0				0				0			344.834	8.99	6
E9PR44	Alpha-crystallin B chain (Fragment)	48.85	8	7	7	32						0			135.102	7.47	1	2	200.33	12.07	2	4	109.475	7.47	1	2	150.14	18.39	3	4	151.6	7.47	1	3	258.672	33.33	4	6	209.877	27.01	3	5	82.2096	22.41	2	2	43.31	7.47	1
P06733	Alpha-enolase	33.64	1	3	9	147		0				0			1243.32	33.64	9	27	1067.63	16.13	4	22	858.788	24.42	6	20	809.832	24.65	6	17	275.985	13.59	3	6	871.641	25.35	6	21	238.76	10.37	3	7		0				0
C9J956	Ankyrin repeat and SOCS box protein 15 (Fragment)	7.22	2	1	1	1														0			42.63	7.22	1	1						0												0
Q5T457	Ankyrin repeat domain-containing protein 2	5	3	1	1	2									85.36	5	1	1									45.81	5	1	1
Q8N283	Ankyrin repeat domain-containing protein 35	0.7	1	1	1	1													41.37	0.7	1	1
P02647	Apolipoprotein A-I	4.87	1	1	1	1																										0			45.59	4.87	1	1		0
P17174	Aspartate aminotransferase, cytoplasmic	31.72	2	9	9	22		0				0			257.714	18.4	4	5		0			53.32	4.12	1	1	156.011	8.23	2	3	186.34	4.84	1	3	153.81	9.44	2	3		0			76.6115	6.78	2	2		0
P00505	Aspartate aminotransferase, mitochondrial	12.56	2	4	4	17		0			70.76	3.26	1	1	121.858	5.58	2	3	83.7834	6.74	2	2	105.2	6.74	2	3	85.5261	6.74	2	2	42.07	3.49	1	1	73.4056	6.74	2	2	44.78	3.26	1	1					51.7	3.49	1
P25705	ATP synthase subunit alpha, mitochondrial	38.34	8	15	15	69		0			69.0051	5.97	2	2	523.338	20.43	7	11		0			870.139	30.02	11	17	510.999	21.16	8	10	268.064	16.64	7	7	165.123	11.75	4	4	122.973	5.97	2	3	278.125	10.31	3	5	47.28	2.89	1
Q5QNZ2	ATP synthase subunit b, mitochondrial	12.31	2	2	2	2										0			43.82	6.15	1	1	51.32	6.15	1	1		0				0				0
P06576	ATP synthase subunit beta, mitochondrial (Fragment)	35.54	4	12	12	116	207.647	9.07	3	4	42.87	2.84	1	1	734.555	24.39	8	15	296.705	15.5	6	9	537.88	22.12	8	13	880.053	18.34	7	18	414.253	17.01	6	9	529.552	19.28	7	12	402.824	13.04	5	9	213.797	12.85	4	5	94.5445	8.13	3
F5H608	ATP synthase subunit d, mitochondrial	20.99	3	1	1	1										0				0				0			48.86	20.99	1	1										0
P30049	ATP synthase subunit delta, mitochondrial	8.33	1	1	1	1													47.42	8.33	1	1
B4DL14	ATP synthase subunit gamma	4.8	3	1	1	4		0			42.2	4.8	1	1										0											51.85	4.8	1	1									48.7	4.8	1
H7C068	ATP synthase subunit O, mitochondrial (Fragment)	25.58	2	1	1	1																	66.04	25.58	1	1																		0				0
Q562R1	Beta-actin-like protein 2	12.23	1	1	4	191		0				0				0				0			659.634	9.31	3	17	847.311	12.23	4	21		0				0			672.872	10.11	3	16		0			342.802	10.11	3
P13929	Beta-enolase	49.77	6	12	16	249	122.34	11.29	3	3	130.563	10.6	3	3	2006.91	34.33	10	43	1592.73	33.18	9	34	1138.42	33.41	9	27	1233.79	30.65	8	24	663.318	26.27	7	15	1277.94	35.02	9	33	276.296	15.67	5	8	351.622	20.97	6	9	516.451	28.8	7
B4DIB0	Calsequestrin	4.27	2	1	1	1																	45.01	4.27	1	1		0								0
P31415	Calsequestrin-1	21.46	1	7	7	51		0			56.71	3.28	1	1	577.47	21.46	7	14	236.504	6.57	2	5	133.75	10.86	3	3	244.53	9.34	3	6	95.5626	8.08	2	2	178.549	12.37	4	4	92.1197	6.57	2	2		0			145.455	9.34	3
E5RJI8	Carbonic anhydrase 1 (Fragment)	25.55	8	3	3	6									50.55	8.76	1	1													75.59	8.76	1	1	100.201	25.55	3	3					43.02	8.76	1	1
P00918	Carbonic anhydrase 2	6.15	1	1	1	1						0			47.43	6.15	1	1										0				0								0
P07451	Carbonic anhydrase 3	57.69	1	11	11	98	51.12	7.31	1	1	101.084	14.23	3	3	647.073	38.08	7	17	503.782	18.85	4	15	640.159	42.69	8	16	192.179	15.38	3	5	218.102	28.85	5	6	548.959	39.62	8	15	171.302	14.62	3	4	152.087	21.92	4	4	245.48	21.15	4
B4DJV2	Citrate synthase	6.18	14	2	2	5										0			45.73	3.53	1	1	42.11	2.65	1	1		0				0				0			85.9197	2.65	1	2		0			42.67	2.65	1
G3V5P4	Cofilin 2 (Muscle), isoform CRA_d	40.94	3	4	4	18	72.04	13.42	1	1	41.41	9.4	1	1	128.033	24.83	2	3	41.01	9.4	1	1	203.567	29.53	3	4	53.91	6.71	1	1	69.4513	16.11	2	2	64.33	9.4	1	1	65.83	13.42	1	1		0				0
G3V4N7	Creatine kinase B-type (Fragment)	7.37	2	1	1	1										0																							48.08	7.37	1	1
P06732	Creatine kinase M-type	57.48	1	19	19	480	691.975	20.73	6	14	883.077	29.13	9	22	2967.78	44.62	12	64	2457.95	30.71	9	55	1848.72	36.75	10	35	1983.84	23.62	7	42	1394.86	35.17	12	34	1776.6	39.9	12	42	1624.26	37.01	10	36	1162.33	28.87	9	25	730.822	26.25	8
P17540	Creatine kinase S-type, mitochondrial	33.41	1	9	9	54	98.9223	3.34	1	2	56.87	3.34	1	1	240.641	18.38	4	5	186.174	7.16	2	3	363.55	20.76	6	8	280.681	22.2	5	6	127.245	8.35	2	3	234.747	14.32	4	6	114.873	7.16	2	3	112.953	11.69	3	3	107.128	5.49	2
P50461	Cysteine and glycine-rich protein 3	18.04	1	2	2	5						0			84.86	9.28	1	1		0			42.54	9.28	1	1	94.763	18.04	2	2														0
P31930	Cytochrome b-c1 complex subunit 1, mitochondrial	17.92	1	5	5	6									99.182	6.67	2	2					87.6	7.5	2	2	52.82	4.38	1	1		0			53.75	3.96	1	1										0
H3BRG4	Cytochrome b-c1 complex subunit 2, mitochondrial	13.83	6	4	4	11						0			68.48	3.88	1	1		0			54.23	2.43	1	1	134.813	8.25	2	2	45.92	3.16	1	1	149.338	8.25	2	4		0			55.91	4.37	1	1		0
P14927	Cytochrome b-c1 complex subunit 7	11.71	1	1	1	1																		0			42.58	11.71	1	1		0												0
P47985	Cytochrome b-c1 complex subunit Rieske, mitochondrial	5.11	1	1	1	1																					42.23	5.11	1	1
C9JFR7	Cytochrome c (Fragment)	38.61	2	3	3	7		0							75.45	16.83	1	1	43.99	13.86	1	1	49.18	7.92	1	1	84.9961	13.86	1	2		0			49.17	7.92	1	1		0			44.42	16.83	1	1		0
P00403	Cytochrome c oxidase subunit 2	11.45	1	2	2	4									53.35	7.05	1	1									41.5	7.05	1	1						0
H3BNI5	Cytochrome c oxidase subunit 4 isoform 1, mitochondrial (Fragment)	27.91	5	1	1	1										0											41.2	27.91	1	1						0
P14854	Cytochrome c oxidase subunit 6B1	20.93	1	1	1	1													46.33	20.93	1	1
P17661	Desmin	42.98	1	14	14	69	141.743	10.64	3	3	42.23	4.47	1	1	486.971	25.96	8	12	107.743	5.11	2	2	282.492	17.02	5	6	216.559	13.19	4	5	165.994	11.7	4	4	256.726	11.06	4	6	133.869	7.23	3	3	173.597	4.89	2	3	138.761	6.17	2
B4DHG0	Dihydrolipoyl dehydrogenase, mitochondrial	3.41	4	1	1	2																	70.31	3.41	1	1	42.8	3.41	1	1						0				0
F5H7M3	Dihydrolipoyllysine-residue acetyltransferase component of pyruvate dehydrogenase complex, mitochondrial	3.59	4	1	1	2									96.89	3.59	1	2										0																0
P68104	Elongation factor 1-alpha 1	2.38	3	1	1	1		0							46.02	2.38	1	1		0								0				0				0
P13639	Elongation factor 2	1.86	1	1	1	1									56.18	1.86	1	1						0								0								0
Q96BJ8	Engulfment and cell motility protein 3	1.11	1	1	1	1									41.99	1.11	1	1
H3BS70	Enoyl-CoA delta isomerase 1, mitochondrial (Fragment)	14.29	3	2	2	2																	92.1726	14.29	2	2
P30084	Enoyl-CoA hydratase, mitochondrial	5.86	1	1	1	2									53.97	5.86	1	1									49.05	5.86	1	1
P05413	Fatty acid-binding protein, heart (Fragment)	28.03	3	3	3	5	46.39	9.85	1	1						0			46.27	7.58	1	1		0				0				0			71.67	10.61	1	1	61.8	10.61	1	1					53.21	7.58	1
M0QZL1	Flavin reductase (NADPH)	9.74	3	1	1	1																					50.69	9.74	1	1
Q13643	Four and a half LIM domains protein 3	7.14	1	1	1	1										0								0			44.1	7.14	1	1										0
P09467	Fructose-1,6-bisphosphatase 1	4.44	1	1	1	2																					55.65	4.44	1	1					47.88	4.44	1	1
O00757	Fructose-1,6-bisphosphatase isozyme 2	14.45	1	3	3	9						0			121.764	8.55	2	2	48.4	5.9	1	1	50.4	5.01	1	1		0			69.69	5.9	1	1		0				0								0
P04075	Fructose-bisphosphate aldolase A (Fragment)	67.58	5	17	19	195	342.239	16.48	3	7	344.759	28.85	7	8	1331.24	65.11	18	32	592.728	54.4	13	20	722.931	47.53	11	19	513.412	36.81	9	14	529.536	29.95	7	11	697.28	40.11	9	16	516.505	39.56	9	12	636.517	31.04	7	13	370.328	24.45	6
P09972	Fructose-bisphosphate aldolase C (Fragment)	17.03	6	2	4	53	118.3	7.14	1	2	190.35	8.52	2	4	345.45	17.03	4	9	183.819	8.52	2	6	143.54	6.32	1	5	374.527	7.14	2	8	116.639	7.14	2	3	152.504	6.32	1	5	199.019	6.32	1	3	53.52	6.32	1	1	134.779	6.32	1
Q86U12	Full-length cDNA clone CS0CAP007YF18 of Thymus of Homo sapiens (human)	5.33	3	2	2	2										0																			71.6228	5.33	2	2
K7EQ48	Glucose-6-phosphate isomerase	16.88	3	5	5	24	108.012	3.16	1	2					235.104	9.92	3	4	46.17	3.59	1	1	120.365	6.75	2	2	125.773	6.33	2	2	98.07	7.17	2	2	89.51	3.16	1	1	125.803	6.12	2	3	61.77	4.01	1	1	151.413	9.92	3
A8MX94	Glutathione S-transferase P	9.2	2	1	1	3						0			78.45	9.2	1	1																	58.85	9.2	1	1						0
P04406	Glyceraldehyde-3-phosphate dehydrogenase	52.24	2	13	13	280	425.168	22.09	5	9	336.872	22.09	5	9	2313.08	52.24	12	50	1614.38	35.52	7	33	960.807	40.9	8	23	891.632	39.1	8	20	709.832	32.54	6	14	1543.76	42.09	9	33	668.965	31.04	6	15	410.383	26.87	5	8	596.263	41.79	8
B7Z806	Glycogen [starch] synthase, muscle	1.67	3	1	1	3					52.16	1.67	1	1		0							49.98	1.67	1	1	45.15	1.67	1	1						0
P11217	Glycogen phosphorylase, muscle form	42.87	2	27	27	233	160.473	5.94	4	4	201.667	8.79	5	6	1685.17	29.57	17	34	1318	16.98	10	32	738.062	18.65	11	19	714.742	11.76	7	15	565.57	17.93	10	15	860.106	24.47	15	21	552.361	13.18	8	15	468.868	12.23	8	10	547.921	13.9	9
P34931	Heat shock 70 kDa protein 1-like	9.83	2	1	4	8		0				0				0			65.43	2.5	1	1		0				0								0			42.57	1.87	1	1		0
P04792	Heat shock protein beta-1	21.95	2	4	4	24	95.6023	4.88	1	2	94.2602	4.88	1	2	56.41	7.8	1	1	92.8134	4.88	1	2		0			74.373	12.68	2	2	89.8826	4.88	1	2	189.69	17.07	3	5	58.16	4.88	1	1	61.64	4.88	1	1	72.5	4.88	1
C9J5A3	Heat shock protein beta-7 (Fragment)	29.7	6	3	3	15	92.6823	7.88	1	2					193.183	19.39	2	4	89.7	7.88	1	1	116.695	7.88	1	2	125.583	18.18	2	2					83.23	7.88	1	1	61.78	7.88	1	1	89.68	7.88	1	1
P08238	Heat shock protein HSP 90-beta	3.59	1	2	2	2									41.08	2.07	1	1						0												0				0
P69905	Hemoglobin subunit alpha	76.76	2	6	6	63	95.0323	8.45	1	2		0			123.771	19.72	2	3	59.74	8.45	1	1	145.218	19.72	2	4	217.408	19.72	2	4	515.664	56.34	5	13	654.637	76.76	6	16	258.023	25.35	3	7	422.737	30.28	3	9	120.468	8.45	1
P68871	Hemoglobin subunit beta	87.07	2	6	10	179	255.723	27.89	3	4	188.991	23.13	3	5	534.907	53.74	6	12	325.887	53.74	6	8	631.813	62.59	7	15	378.299	44.22	5	9	1177.14	81.63	9	29	1294.24	78.91	9	35	489.102	63.95	7	12	889.804	63.95	7	18	630.972	70.75	8
P02042	Hemoglobin subunit delta	61.22	3	3	7	52		0				0			289.09	46.94	5	6		0			179.901	26.53	3	5		0			296.156	34.69	4	7	353.314	40.14	5	13		0				0				0
C9JUP3	Histone-lysine N-methyltransferase SMYD1	11.65	3	1	1	1																										0				0			47.29	11.65	1	1
P01857	Ig gamma-1 chain C region	4.24	1	1	1	1																										0			58.67	4.24	1	1
P01859	Ig gamma-2 chain C region	4.29	2	1	1	1																													48.09	4.29	1	1						0
P01834	Ig kappa chain C region	32.08	1	2	2	4																	60.31	13.21	1	1						0			79.2174	18.87	1	2		0			72.65	18.87	1	1		0
P0CF74	Ig lambda-6 chain C region	14.15	5	1	1	1																										0			41.99	14.15	1	1
P09913	Interferon-induced protein with tetratricopeptide repeats 2	2.54	1	1	1	3																	43.04	2.54	1	1	45.38	2.54	1	1					42.47	2.54	1	1		0				0
B4DFL2	Isocitrate dehydrogenase [NADP]	22.5	4	7	7	18						0			86.81	3.25	1	1		0				0			211.954	8.25	3	5	47.25	2.75	1	1	158.943	9	3	4	42.42	2.75	1	1	97.1796	6.5	2	2		0
P08237	6-phosphofructokinase, muscle type	27.24	4	14	14	69	52.52	1.74	1	1	98.2142	4.01	2	2	642.005	13.35	7	12	193.353	5.34	3	4	421.683	12.68	6	9	307.793	9.48	5	6	137.831	8.01	4	4	335.448	13.89	6	9	142.502	7.74	4	4	112.917	5.07	2	2	190.783	8.68	4
P23109-2	Isoform 2 of AMP deaminase 1	9.02	2	4	4	5									122.842	4.25	2	2	49.47	2.19	1	1		0							57.7	2.84	1	1	63.22	1.93	1	1		0
P08133-2	Isoform 2 of Annexin A6 OS=Homo sapiens GN=ANXA6 - [ANXA6_HUMAN]	7.18	4	3	3	4										0							56.07	2.34	1	1					42.69	3.12	1	1		0			79.6148	4.06	2	2
Q14315-2	Isoform 2 of Filamin-C	1.97	2	4	4	6									63.314	0.45	1	2					52.2	0.48	1	1	46.53	0.45	1	1		0			77.6528	1.04	2	2
P28161-2	Isoform 2 of Glutathione S-transferase Mu 2	14.14	5	2	2	8																	41.84	7.33	1	1	79.103	14.14	2	2		0			93.2928	7.33	1	2					111.02	7.33	1	2
P21695-2	Isoform 2 of Glycerol-3-phosphate dehydrogenase [NAD(+)], cytoplasmic	24.23	2	5	5	18									249.802	19.63	4	4		0			159.037	7.98	2	3	197.289	11.04	2	4	113.957	7.98	2	3	46.95	4.6	1	1		0			41.31	4.6	1	1		0
P08107-2	Isoform 2 of Heat shock 70 kDa protein 1A/1B	13.31	4	3	5	21	56.94	2.73	1	1	94.5602	4.78	2	2	125.279	8.7	3	3	77.57	2.73	1	1	121.603	5.29	2	2	93.41	2.73	1	1	57.25	2.73	1	1	82.8951	4.61	2	2	42.57	2.05	1	1						0
P11142-2	Isoform 2 of Heat shock cognate 71 kDa protein	23.73	15	6	8	16		0			43.71	4.67	1	1	239.006	9.53	4	6	65.43	3.25	1	1		0			79.403	5.68	2	2	49.71	2.84	1	1	119.568	8.52	3	3	47.94	2.43	1	1		0
Q6YN16-2	Isoform 2 of Hydroxysteroid dehydrogenase-like protein 2	5.22	2	1	1	1										0							48.98	5.22	1	1										0
Q04760-2	Isoform 2 of Lactoylglutathione lyase	11.83	2	1	1	2									46.57	11.83	1	1					46.88	11.83	1	1						0								0
O75112-2	Isoform 2 of LIM domain-binding protein 3	19.61	4	1	8	47	69.26	1.94	1	1	91.3002	2.27	1	2	364.787	15.72	6	8	210.922	6.81	3	4	98.187	4.86	2	3	238.259	10.05	4	5	197.213	15.4	6	6	246.185	9.08	4	6		0			57.54	3.73	1	1	55.43	2.59	1
P52179-2	Isoform 2 of Myomesin-1	8.18	3	9	9	18	80.6561	1.57	2	2		0				0				0			77.7452	1.76	2	2	72.713	1.7	2	2	93.2113	1.76	2	2	126.813	2.39	3	4	89.11	2.01	2	2		0			53.81	1.07	1
Q9UBF9-2	Isoform 2 of Myotilin	7.32	3	2	2	2									41.77	3.82	1	1		0				0				0												0			54.32	3.5	1	1
Q53GG5-2	Isoform 2 of PDZ and LIM domain protein 3	14.56	4	3	3	11									53.51	5.06	1	1	120.323	4.75	1	2	41.06	4.75	1	1	75.54	4.75	1	1	66.42	4.75	1	1	95.9756	9.49	2	2		0				0
Q6NZI2-2	Isoform 2 of Polymerase I and transcript release factor	11.67	2	2	2	2		0							54.71	6	1	1									60.22	5.67	1	1																		0
P11177-2	Isoform 2 of Pyruvate dehydrogenase E1 component subunit beta, mitochondrial	9.38	5	2	2	10									192.932	9.38	2	3		0			93.63	4.69	1	1		0				0			126.956	4.69	1	2	98.23	4.69	1	1	116.335	4.69	1	2
Q9NTJ3-2	Isoform 2 of Structural maintenance of chromosomes protein 4	0.57	3	1	1	1		0			44.84	0.57	1	1																										0
P10599-2	Isoform 2 of Thioredoxin	15.29	2	1	1	2									45.27	15.29	1	1	43.88	15.29	1	1
P60174-1	Isoform 2 of Triosephosphate isomerase	59.44	3	10	10	107	203.527	16.06	3	4	131.63	10.84	2	2	573.26	41.37	7	15	452.851	28.11	5	10	456.575	49	8	9	536.512	46.18	8	13	246.415	26.51	4	6	599.67	53.01	9	13	355.482	38.55	7	8	234.457	19.68	3	5	148.184	14.06	2
Q16851-2	Isoform 2 of UTP--glucose-1-phosphate uridylyltransferase	4.02	3	1	1	3		0							49	4.02	1	1		0			55.93	4.02	1	1		0							55.12	4.02	1	1		0
P49748-2	Isoform 2 of Very long-chain specific acyl-CoA dehydrogenase, mitochondrial	7.42	4	3	3	9									168.026	7.42	3	4						0			85.923	4.74	2	2	50.32	2.37	1	1		0				0			90.8548	4.74	2	2		0
Q8NI60-3	Isoform 3 of Chaperone activity of bc1 complex-like, mitochondrial	2.69	2	1	1	1																	47.85	2.69	1	1
Q9ULH0-3	Isoform 3 of Kinase D-interacting substrate of 220 kDa	1.55	6	1	1	2									43.75	1.55	1	1		0																							44.64	1.55	1	1
Q00872	Myosin-binding protein C, slow-type	36.15	14	28	29	219	445.349	8.37	7	10	148.562	2.76	3	4	1573.11	25.47	20	34	847.691	14.6	12	20	933.83	18.34	14	21	825.405	17.28	14	21	555.333	13.18	10	14	1079.35	17.99	15	26	792.205	16.21	13	17	264.708	6.68	6	7	289.543	7.57	7
Q96HC4-3	Isoform 3 of PDZ and LIM domain protein 5	16.36	12	3	3	8					44.62	5.14	1	1	106.114	5.61	1	2		0			81.3352	5.61	1	2	48.51	5.14	1	1	46.21	5.61	1	1		0				0				0			53.1	5.14	1
P36871	Phosphoglucomutase-1	27.4	3	7	7	32	74.06	4.38	1	1	49.15	4.93	1	1	276.135	23.01	6	7	78.4467	7.4	2	2	167.894	6.85	2	3	82.383	4.93	1	2	42.04	3.01	1	1	220.217	16.16	4	5	70.9948	7.4	2	2	79.2248	7.4	2	2		0
Q4VNC1-3	Isoform 3 of Probable cation-transporting ATPase 13A4	2.43	4	1	1	1
P04179-3	Isoform 3 of Superoxide dismutase [Mn], mitochondrial	17.28	7	2	2	5					48.53	8.64	1	1	42.3	8.64	1	1	52.99	8.64	1	1						0							42.7	8.64	1	1	50.81	8.64	1	1		0
Q13642-5	Isoform 5 of Four and a half LIM domains protein 1	47.3	12	12	12	116	98.3523	7.77	2	2	61.83	3.72	1	1	424.198	21.62	5	9	364.15	12.84	3	8	674.325	28.38	7	16	467.599	31.08	8	12	316.753	23.31	6	9	409.713	35.81	9	11	271.521	19.93	5	6	473.11	25.68	6	9	456.596	19.93	5
P35573-2	Isoform 5 of Glycogen debranching enzyme	1.32	3	2	2	2									44.55	0.79	1	1										0				0				0			45.15	0.53	1	1
O75112-6	Isoform 6 of LIM domain-binding protein 3	43.46	3	1	8	46	69.26	4.24	1	1	91.3002	4.95	1	2		0			210.922	14.84	3	4	98.187	10.6	2	3	238.259	21.91	4	5		0			246.185	19.79	4	6	217.405	24.73	5	5	57.54	8.13	1	1	55.43	5.65	1
P22626-2	Isoform A2 of Heterogeneous nuclear ribonucleoproteins A2/B1	4.69	2	1	1	1										0											48.02	4.69	1	1
O00499-9	Isoform BIN1-10-13 of Myc box-dependent-interacting protein 1	9.29	11	2	2	2									42.95	4.4	1	1										0							51.44	4.89	1	1
H3BQ34	Pyruvate kinase	52.35	5	23	23	177	161.466	8.47	3	3	110.39	6.4	2	2	1485.87	40.11	17	32	890.514	26.74	11	20	742.512	27.68	9	16	877.396	37.1	13	19	475.319	15.44	5	9	826.779	28.25	10	18	439.356	20.72	7	10	319.815	13.37	5	7	285.54	16.38	6
O60662-2	Isoform Short of Kelch-like protein 41	30.2	2	11	11	34	56.44	2.85	1	1		0			264.912	13.42	5	7	76.5674	4.53	2	2	83.0126	7.05	2	2	72.7061	2.85	1	2		0			141.987	6.71	3	4	162.812	6.38	3	4	92.1348	4.53	2	2		0
A8MW50	L-lactate dehydrogenase (Fragment)	11.64	4	1	2	3										0				0				0			47.41	6.47	1	1		0							50.67	6.47	1	1		0
P00338-4	Isoform 4 of L-lactate dehydrogenase A chain	41.27	12	11	12	65	45.98	2.71	1	1	246.734	19.28	4	5	273.276	16.27	4	5	303.684	12.35	3	6	239.267	18.98	5	5	351.468	18.37	5	7	116.706	16.87	4	4	299.852	18.67	4	6	319.931	13.86	3	6	132.703	8.43	2	3	290.379	21.39	5
P51884	Lumican	5.33	1	1	1	3																	52.83	5.33	1	1	49.63	5.33	1	1		0			42.82	5.33	1	1
C9JRL4	Malate dehydrogenase, cytoplasmic (Fragment)	52.94	2	1	4	26		0							227.355	52.94	4	5		0				0				0				0				0				0				0				0
P40925	Malate dehydrogenase, cytoplasmic	26.65	7	4	7	41		0			50.76	2.99	1	1	230.424	17.37	4	5	226.624	17.07	4	5	101.395	8.38	2	2	203.006	16.47	4	6		0			157.677	12.28	3	4	218.903	19.16	5	5	124.489	11.68	3	3	82.4683	6.59	2
P40926	Malate dehydrogenase, mitochondrial	34.02	3	8	8	58	48.78	5.62	1	1	47.57	4.73	1	1	337.7	30.47	7	9	77.0667	9.47	2	2	355.035	26.63	6	8	164.574	12.72	3	4	96.1126	10.65	2	2	145.507	13.91	3	3	322.94	22.49	5	7	114.362	13.61	3	3	155.315	13.91	3
H7BZX2	Metalloendopeptidase OMA1, mitochondrial (Fragment)	2.74	1	1	1	3		0							49.46	2.74	1	1	46.58	2.74	1	1		0				0				0			48.04	2.74	1	1		0				0				0
P41218	Myeloid cell nuclear differentiation antigen	2.21	1	1	1	2													42.91	2.21	1	1													44.19	2.21	1	1
P02144	Myoglobin	70.78	2	10	10	478	889.224	60.39	7	20	668.747	50	7	16	2539.25	61.04	7	53	2475.81	61.04	7	51	2635.9	61.69	7	54	2193.72	51.3	5	48	1592.34	61.69	8	37	1816.25	60.39	6	43	1229.79	51.3	5	29	1138.8	40.91	4	27	604.43	61.04	6
P54296	Myomesin-2	19.86	2	21	21	59		0			50	0.68	1	1	203.812	4.37	4	4	221.964	5.6	6	6	242.892	6.76	8	8	241.367	5.8	6	6	324.131	5.73	6	8	225.199	4.78	5	7	50.88	0.68	1	1	104.085	2.05	2	2	157.444	3.21	4
Q5VTT5	Myomesin-3	3.48	5	3	3	5	41.73	1.25	1	1					41.92	1.25	1	1		0			51.75	0.84	1	1	51.43	1.39	1	1		0				0
P05976	Myosin light chain 1/3, skeletal muscle isoform	82.99	6	12	14	181	360.559	12.37	2	7	277.677	29.9	5	8	1154.43	68.56	11	31	654.784	52.58	7	18	515.103	50	9	13	778.867	55.15	8	17	481.647	55.67	8	14	713.502	56.19	9	18	266.124	25.26	4	6	475.321	27.32	5	12	380.441	51.55	7
P08590	Myosin light chain 3	54.36	5	8	10	89	142.22	14.36	3	3	62.66	6.67	1	1	409.391	42.56	8	10	344.655	32.82	6	8	591.653	50.26	9	14	485.45	42.05	7	9	295.294	29.23	4	6	303.589	35.9	7	8	466.857	34.36	6	9	243.423	30.77	4	5	315.085	29.23	4
P14649	Myosin light chain 6B	12.5	1	2	2	5										0				0			48.9	6.25	1	1		0																0
F8VPF3	Myosin light polypeptide 6 (Fragment)	22.31	12	1	3	19									133.552	22.31	3	4	73.3834	19.23	2	2	106.895	12.31	2	2	74.043	22.31	2	2	68.0826	9.23	1	2	112.068	12.31	2	3	54.35	9.23	1	1		0			70.43	9.23	1
Q96A32	Myosin regulatory light chain 2, skeletal muscle isoform	75.15	4	12	12	202	125.192	7.69	1	2	176.037	19.53	3	3	1262.25	75.15	12	34	1228.44	67.46	10	29	604.332	44.38	6	15	719.116	53.25	7	15	781.651	55.62	6	20	618.272	69.23	9	16	444.088	45.56	6	11	389.164	43.2	6	10	186.733	30.18	4
P10916	Myosin regulatory light chain 2, ventricular/cardiac muscle isoform	75.9	6	10	10	65	68.6217	11.45	2	2	122.657	24.7	3	3	384.144	49.4	5	8	161.41	15.66	2	4	377.076	31.33	3	10	269.276	40.36	5	7	155.692	18.67	2	4	109.887	26.51	3	3	278.742	40.36	4	5	210.943	32.53	4	5	163.245	24.1	3
P12882	Myosin-1	49.25	1	19	93	824	3012.9	25.73	42	74	2681	24.76	40	67	3005.87	25.94	40	62	1150.86	13.87	21	30	1446.84	16.5	25	37	1264.67	13.62	21	28	2015.75	25.79	37	53	3285.08	30.27	49	77	2426.55	16.97	29	59	932.318	12.84	20	24	1574.44	18.41	27
Q9UKX3	Myosin-13	13.36	1	2	28	210		0				0				0				0			577.451	4.13	8	14	471.745	5.57	8	11		0				0			773.352	5.62	10	20		0				0
Q9Y2K3	Myosin-15	1.13	1	2	2	3						0			42.96	0.51	1	1																						0
Q9UKX2	Myosin-2	52.65	1	23	99	979	2660.54	25.04	40	67	2785.07	27.25	43	72	3002.91	25.91	38	63	1418.55	17	24	36	1802.45	18.19	27	42	1507.46	17.47	26	35	2612.66	28.8	41	66	3846.53	35.19	55	90	3550.78	27.82	44	81	1271.45	16.33	25	32	1972.4	23.18	32
P13533	Myosin-6	32.13	1	4	65	551		0			2852.55	20.42	36	71		0				0				0				0			512.401	6.7	10	13		0				0				0				0
P12883	Myosin-7	48.94	1	32	93	796	3500.95	27.44	45	88	4065.54	32.4	54	102	1623.13	15.92	23	36	813.454	10.9	16	22	2207.73	25.79	36	54	1718.85	21.65	32	44	1028.25	11.73	16	23	1903.42	19.28	28	45	3662.29	27.86	46	81	1073.99	15.14	21	25	1050.77	14.06	21
P13535	Myosin-8	30.3	1	1	58	513		0				0				0				0				0				0				0			1606.42	16.26	26	41	1355.54	13.32	22	34		0				0
Q14324	Myosin-binding protein C, fast-type	18.14	1	14	15	51		0				0			558.24	9.55	7	12	233.081	4.29	4	7	206.906	5.17	5	5	216.138	4.73	4	4	127.145	2.1	2	3	164.292	4.29	4	5	113.436	3.16	3	3	42.76	1.23	1	1		0
Q9NP98	Myozenin-1	29.43	1	5	5	84	123.606	16.39	3	3	132.63	18.39	3	3	532.56	29.43	5	13	216.919	17.39	3	5	319.126	29.43	5	7	314.036	17.39	3	7	158.212	25.08	4	4	284.328	29.43	5	6	227.736	15.38	3	6	251.761	16.39	3	6	157.931	18.39	3
F8WAS3	NADH dehydrogenase [ubiquinone] 1 alpha subcomplex subunit 5	14.29	5	1	1	1									46.76	14.29	1	1		0								0
P19404	NADH dehydrogenase [ubiquinone] flavoprotein 2, mitochondrial	4.42	2	1	1	1									48.22	4.42	1	1										0												0
B4DJ81	NADH-ubiquinone oxidoreductase 75 kDa subunit, mitochondrial	5.24	6	2	2	7									108.044	5.24	2	2					83.1926	2.62	1	2	98.413	5.24	2	2					43.34	2.62	1	1						0
F8WCL5	Nebulin	1.3	6	2	2	5														0				0											79.65	0.25	1	2	61.34	1.05	1	1	64.53	1.05	1	1
A6NIW5	Peroxiredoxin 2, isoform CRA_a	12.5	2	1	1	3									73.77	12.5	1	1						0				0				0			43.6	12.5	1	1										0
Q06830	Peroxiredoxin-1	5.03	1	1	1	1														0				0				0				0							45.7	5.03	1	1
P30041	Peroxiredoxin-6	9.38	1	1	1	2						0			41.84	9.38	1	1		0															48.24	9.38	1	1										0
P30086	Phosphatidylethanolamine-binding protein 1	39.57	1	5	5	14	107.41	10.7	1	1	76.31	10.7	1	1	129.912	17.65	2	2	48.84	10.7	1	1	58.84	4.81	1	1	116.004	27.81	3	3					55.97	10.7	1	1		0			43.07	7.49	1	1	54.34	10.7	1
B7Z7A9	Phosphoglycerate kinase	37.79	3	10	10	51		0			47.89	4.63	1	1	423.575	22.62	6	9	195.265	11.05	3	4	274.363	20.57	5	7	93.0261	8.74	2	2	147.343	11.83	3	3	296.178	25.71	7	9	249.455	9	2	4	113.566	11.83	3	3	158.42	11.31	3
P15259	Phosphoglycerate mutase 2	33.2	1	6	6	35		0							349.4	33.2	6	9	249.94	14.23	3	7	157.696	14.23	3	4	50.96	4.74	1	1	96.9513	4.74	1	2	127.228	8.7	2	3		0			54.16	4.74	1	1	87.2583	10.28	2
P13796	Plastin-2	1.12	4	1	1	1																									44.61	1.12	1	1
A5A3E0	POTE ankyrin domain family member F	6.6	1	1	5	236		0				0				0				0				0			889.359	5.58	4	24		0				0				0				0				0
P0CG38	POTE ankyrin domain family member I	5.12	1	1	4	85		0				0				0				0				0			241.59	4.09	3	9		0				0				0				0				0
Q9Y235	Probable C->U-editing enzyme APOBEC-2	12.95	1	2	2	10									89.682	12.95	2	2					95.0026	5.36	1	2	46.86	5.36	1	1		0			72.9	5.36	1	1	60.33	5.36	1	1					66.6242	5.36	1
P48147	Prolyl endopeptidase	4.37	1	2	2	3									78.5597	4.37	2	2						0											44.81	2.39	1	1
C9J7B1	Protein NipSnap homolog 2 (Fragment)	24.62	5	1	1	4	41.61	24.62	1	1		0											47.06	24.62	1	1		0			46.56	24.62	1	1		0				0								0
P05109	Protein S100-A8	11.83	1	1	1	2													60.27	11.83	1	1	42.8	11.83	1	1
Q9Y2J8	Protein-arginine deiminase type-2	4.66	2	2	2	4						0			85.354	4.66	2	2					50.01	2.11	1	1					42.32	2.11	1	1		0				0				0
E9PLK3	Puromycin-sensitive aminopeptidase	2.51	9	2	2	2									54.23	1.31	1	1		0				0				0				0							47.52	1.2	1	1
H7BZA8	Ral GTPase-activating protein subunit alpha-2 (Fragment)	3.6	5	1	1	1										0			44.11	3.6	1	1		0
B4DYT9	Sarcalumenin	16.71	3	6	6	13						0			126.242	6.03	2	2						0			206.221	8.58	3	5		0			122.881	8.58	3	3	41.88	1.86	1	1		0			50.32	3.02	1
B3KY17	Sarcoplasmic/endoplasmic reticulum calcium ATPase 1	6.79	8	4	4	7	49.8	1.73	1	1					104.619	3.57	2	3						0				0			45.72	1.73	1	1	46.18	1.5	1	1		0
E9PRG7	Serine-protein kinase ATM (Fragment)	7.53	5	1	1	1	42.11	7.53	1	1		0
H7C5E8	Serotransferrin (Fragment)	20.28	3	2	2	2																										0			75.9256	20.28	2	2
P02768	Serum albumin	53.86	6	24	24	161	93.4223	4.11	2	2	79.2202	4.11	2	2	693.236	31.2	14	18	295.455	12.64	6	7	482.322	10.18	5	11	781.205	21.35	9	18	792.32	28.74	13	22	873.797	26.77	13	25	413.256	16.26	7	10	417.981	14.78	6	10	479.011	19.87	8
P38646	Stress-70 protein, mitochondrial	2.36	1	1	1	1									47.97	2.36	1	1						0				0
H0Y8X1	Succinate dehydrogenase [ubiquinone] flavoprotein subunit, mitochondrial (Fragment)	11.11	5	1	1	3						0				0											93.143	11.11	1	2		0			66.32	11.11	1	1						0
K7ENL1	TFIIH basal transcription factor complex helicase XPD subunit (Fragment)	11.93	7	1	1	1										0																0							43.73	11.93	1	1
E9PH29	Thioredoxin-dependent peroxide reductase, mitochondrial	5.88	2	1	1	2										0								0			47.5	5.88	1	1						0								0
Q3B759	TNNT1 protein	42.19	12	5	7	47		0			71.03	7.81	1	1	200.332	21.88	3	5	93.9534	13.02	2	2	462.723	42.19	7	11	311.625	20.83	3	6	83.0572	8.33	1	2	163.038	14.06	2	3	263.104	26.04	4	5	175.602	16.15	2	3	152.453	13.02	2
P40939	Trifunctional enzyme subunit alpha, mitochondrial	5.77	3	3	3	4						0			58.82	1.97	1	1						0			45.99	1.97	1	1		0			51.21	1.83	1	1		0			52.15	1.97	1	1		0
Q6ZMU5	Tripartite motif-containing protein 72	8.6	2	3	3	12									84.5281	2.52	1	2	71.3667	2.52	1	2	62.49	2.52	1	1	52.63	2.52	1	1	50.54	2.52	1	1	72.72	3.56	1	1		0								0
B7Z6N9	Tropomodulin-4	13.77	3	3	3	7									170.122	13.77	3	4					41.92	5.07	1	1	52.58	5.43	1	1		0			54.12	5.07	1	1		0				0				0
Q5VU72	Tropomyosin 3, isoform CRA_a	29.55	5	2	10	74		0				0				0				0				0				0				0				0				0			97.9458	7.69	2	3		0
P09493	Tropomyosin alpha-1 chain (Fragment)	50.7	6	7	19	172	192.707	13.03	4	4	153.892	11.62	3	4	737.688	37.32	13	22	688.278	29.58	10	19	669.663	25	8	16	674.031	28.52	10	17	294.575	20.77	6	8	565.583	29.58	8	14	504.031	21.83	7	11	373.963	18.31	6	9	345.456	22.54	7
P06753	Tropomyosin alpha-3 chain	53.33	3	7	19	115	235.999	15.44	4	5	224.102	17.89	5	7	554.384	31.93	9	16	395.44	24.56	7	12	366.243	21.75	6	11	404.219	33.33	9	13	184.4	16.84	4	5	398.098	26.32	6	11	200.969	18.95	5	6	97.9458	6.67	2	3	221.708	15.09	4
P07951	Tropomyosin beta chain	50.35	5	10	17	208	255.859	21.48	6	7	129.48	14.08	3	3	880.305	40.49	13	25	1031.87	36.27	11	28	712.11	27.82	8	18	879.155	36.62	13	24	388.487	16.9	6	11	589.406	29.58	9	16	544.128	29.23	8	13	498.667	28.87	8	11	403.722	29.23	8
P02585	Troponin C, skeletal muscle	61.25	2	5	5	57	118.192	18.13	2	2		0			560.797	61.25	5	13	243.604	18.13	2	6	220.237	18.13	2	5	94.8161	17.5	2	2	122.602	18.13	2	3	308.262	28.13	3	7	61.85	7.5	1	1	273.047	28.13	3	5	47.36	7.5	1
P63316	Troponin C, slow skeletal and cardiac muscles	31.68	2	4	4	16	131.573	13.66	2	3	99.5389	6.21	1	2	71.46	11.18	1	1		0			83.52	6.83	1	2	179.249	18.63	2	4	43.3	6.21	1	1	84.0328	18.01	2	2		0			41.71	11.18	1	1		0
P48788	Troponin I, fast skeletal muscle	17.03	2	3	3	39		0							276.696	17.03	3	5	186.09	9.34	2	4	45.64	7.14	1	1	165.968	17.03	3	3	135.203	9.34	2	2	277.197	17.03	3	6	142.24	7.14	1	2	90.0196	7.14	1	2	342.108	9.34	2
P19237	Troponin I, slow skeletal muscle	31.02	4	6	6	43	123.515	12.3	2	3		0			208.402	12.3	2	4	184.44	13.9	2	4	217.477	24.6	4	5	397.466	31.02	6	10	166.178	12.3	2	4	44.6	6.42	1	1	84.7648	12.3	2	2	193.319	12.3	2	4
C9JCA5	Troponin T, fast skeletal muscle (Fragment)	35.56	14	7	9	61	44.53	6.69	1	1	51.88	6.69	1	1	737.006	32.64	7	17	179.974	24.69	4	5	189.632	13.81	4	5	92.9961	6.69	1	2	126.923	12.97	2	2	355.079	19.25	3	8	110.557	10.04	2	2	150.172	12.97	2	3	204.33	17.15	3
A8MUB1	Tubulin alpha-4A chain	24.25	18	6	6	14						0				0			46.88	3.46	1	1	160.448	12.01	3	4	105.681	10.85	3	3		0			80.9156	9.01	2	2	81.0048	7.39	2	2		0
Q5ST81	Tubulin beta chain	8.6	18	3	3	6		0							54.08	2.69	1	1		0				0			105.945	8.6	3	3		0			46.9	2.69	1	1	46.57	2.69	1	1
H3BRC0	Ubiquinone biosynthesis protein COQ9, mitochondrial	8.7	3	1	1	1										0											65.61	8.7	1	1
K7ES11	Ubiquitin-conjugating enzyme E2 O (Fragment)	0.87	2	1	1	1																									46.72	0.87	1	1
P21796	Voltage-dependent anion-selective channel protein 1	42.4	2	7	8	20		0							244.069	20.85	4	5	71.3967	12.72	2	2	55.45	6.71	1	1	206.944	19.43	3	3	52.82	3.89	1	1	256.865	21.55	4	5	75.85	3.89	1	1	74.33	10.6	2	2		0
A2A3S1	Voltage-dependent anion-selective channel protein 2 (Fragment)	17.43	6	1	1	1									53.02	17.43	1	1																		0
Q9Y277	Voltage-dependent anion-selective channel protein 3	8.13	7	1	2	2									69.41	3.53	1	1		0								0								0				0							43.57	4.59	1
						12704
[truncated: 21 more columns]

## Sheet: SuppData4
			Label-free quantification performed on proteins extracted 'Post-MSI'										Intensities of Maldi-MSI peaks								Molecular weight (kDa)			Correlation index
Gene name	Accession	Protein name	Peptides used for quantification	Protein Score	Individual 1	Individual 2	Individual 3	Individual 4	Individual 5	Individual 6	Individual 7	Individual 8	Individual1	Individual2	Individual3	Individual4	Individual5	Individual6	Individual7	Individual8	Theoritical	Observed in Maldi Imaging	Mass tolerance interval (%)
ACTA1	P68133	Actin, alpha skeletal muscle	5	271.22	581672	1.23705e+06	1.12802e+06	6.14682e+06	5.22277e+06	2.05221e+06	2.36034e+06	2.25412e+06
ACTN2	P35609	Alpha-actinin-2	3	139.59	52855.3	97704.9	127439	287721	272822	166942	131134	142962
CRYAB	E9PNH7	Alpha-crystallin B chain (Fragment)	1	54.52	105871	151674	264317	431693	321079	115452	310813	325028	0.11	0.15	0.27	0.14	0.17	0.14	0.31	0.09	11.9893	11.993	0.0308606	0.21
CA3	P07451	Carbonic anhydrase 3	1	52.73	180067	397246	559032	1.03675e+06	626848	310847	756264	804926
CKM	P06732	Creatine kinase M-type	6	309.34	1.37162e+06	2.84131e+06	2.31253e+06	1.01412e+07	4.82306e+06	2.40622e+06	4.16003e+06	4.95454e+06
COX5A	H3BRM5	Cytochrome c oxidase subunit 5A, mitochondrial	1	38.66	27826.4	48677.3	78538.8	156941	129608	53319.1	169981	76744.8	0.76	0.93	1	0.94	0.92	0.94	1.01	0.93	7.76621	7.80285	0.47186	0.57
ENO3	E5RGZ4	Enolase (Fragment)	4	256.85	105741	356490	127261	1.00197e+06	353295	252117	300648	283873
FHL1	Q5JXI0	Four and a half LIM domains protein 1 (Fragment)	1	60.22	49824.2	105802	100844	326464	257842	160518	147170	191322	0.05	0.07	0.16	0.17	0.16	0.18	0.21	0.06	16.1395	16.085	-0.337804	0.42
ALDOC	H3BMQ8	Fructose-bisphosphate aldolase A (Fragment)	2	262.86	90121	266580	182069	790793	234593	361801	454668	478963	0.06	0.09	0.14	0.22	0.12	0.13	0.17	0.04	15.5	14.9917	-3.27942	0.58
GAPDH	E7EUT4	Glyceraldehyde-3-phosphate dehydrogenase	2	85.94	214126	180490	270065	591070	300075	177122	242161	244736
HSPB7	E9PN25	Heat shock protein beta-7 (Fragment)	1	72.39	9604.69	14232.5	13016.9	15747.5	9365.64	11180.1	15356.5	16032.4	0.09	0.16	0.24	0.16	0.21	0.19	0.25	0.21	13.6667	13.7029	0.265296	0.36
HBA1	P69905	Hemoglobin subunit alpha	4	324.6	1.03351e+06	1.18289e+06	1.03569e+06	3.67591e+07	7.0434e+06	1.59533e+06	1.39731e+06	2.95748e+06
HBB	P68871	Hemoglobin subunit beta	5	297.88	858926	2.10364e+06	2.00765e+06	5.4759e+07	1.1517e+07	3.89396e+06	3.12284e+06	5.67232e+06
HIST1H1T	P22492	Histone H1t	1	56.25	31478.4	36572.4	41083.5	161187	109375	35301	66174.7	64682.5
FLNC	Q14315-2	Isoform 2 of Filamin-C	1	36.83	20922.2	16295	13169.3	24661.4	22026.8	16020.6	17538.7	25848.4
LDHA	P00338-4	Isoform 4 of L-lactate dehydrogenase A chain	1	46.25	13848.2	20027	28356.2	48538.2	55756.3	43995.5	45383.4	32466	0.86	0.97	0.97	1.13	1.16	1.04	1.04	0.95	7.87011	7.83391	-0.459883	0.93
LDB3	O75112-6	Isoform 6 of LIM domain-binding protein 3	1	65.35	20864.9	78896	54047.2	216960	158069	76567	108977	102388
MB	B0QYF8	Myoglobin (Fragment)	5	423.38	1.69115e+06	2.94799e+06	4.68156e+06	1.77972e+07	6.60174e+06	2.26384e+06	6.35077e+06	7.80039e+06	0.06	0.07	0.16	0.23	0.24	0.12	0.14	0.04	15.9784	16.0208	0.265592	0.58
MYL1	P05976	Myosin light chain 1/3, skeletal muscle isoform	5	326.53	227452	538707	391136	2.69575e+06	1.60538e+06	664044	1.10486e+06	1.02227e+06
MYL3	P08590	Myosin light chain 3	3	151.01	198158	204104	420390	677870	990786	282440	616417	414097
MYLPF	Q96A32	Myosin regulatory light chain 2, skeletal muscle isoform	1	36.08	10827.6	6091.83	5522.06	10732.8	13355.4	10671.4	12047.9	18216.9
MYH1	P12882	Myosin-1	4	1550.4	249931	386211	373959	1.05671e+06	409203	417609	425170	569928
MYH2	Q9UKX2	Myosin-2	5	1647.41	305599	402175	320777	1.51463e+06	933904	447792	697457	500090
MYH7	P12883	Myosin-7	18	1754.96	641065	818616	1.32798e+06	2.40994e+06	3.92505e+06	1.44975e+06	1.59083e+06	1.16841e+06
ATP2A1	B3KY17	Sarcoplasmic/endoplasmic reticulum calcium ATPase 1	1	40.4	2798.61	6393.04	9782.43	2538.78	7232.82	5379.78	16050.9	2763.36
ALB	P02768	Serum albumin	3	153.02	447092	593590	1.02526e+06	4.45943e+06	1.3768e+06	1.09578e+06	1.30433e+06	1.69986e+06
SOD2	H7BYH4	Superoxide dismutase	1	45.64	28287.2	37229.4	32431.5	21199.8	42097.6	24695.2	41873.2	66282.9	1.33	1.42	1.27	1.44	1.4	1.31	1.52	1.61	6.76845	6.75061	-0.263596	0.75
TTN	Q8WZ42	Titin (Fragment)	1	41.91	20545.3	4977.51	6398.46	9847.84	11316.4	6267.21	7995.79	7507.43
TPM1	H0YK20	Tropomyosin alpha-1 chain (Fragment)	2	415.02	245862	573142	843578	2.23605e+06	464286	1.37829e+06	1.33475e+06	1.04994e+06	0.22	0.32	0.42	0.39	0.34	0.29	0.46	0.29	11.0107	11.0511	0.367267	0.5
TPM3	P06753	Tropomyosin alpha-3 chain	2	134.28	339971	551755	1.14037e+06	1.19902e+06	1.06195e+06	389820	1.02697e+06	785557
TPM2	P07951	Tropomyosin beta chain	6	335.21	1.56776e+06	2.4486e+06	1.80981e+06	6.70626e+06	3.07786e+06	1.99973e+06	3.69814e+06	4.62584e+06
TNNC2	P02585	Troponin C, skeletal muscle	2	115.27	45112.3	35209	50262.7	94853.7	141951	45064.1	55620.2	42680.2
TNNI2	P48788	Troponin I, fast skeletal muscle	2	167.29	150367	684326	575875	1.8623e+06	540773	414432	1.04755e+06	1.09205e+06
TNNI1	P19237	Troponin I, slow skeletal muscle	3	132.72	404844	499058	575350	760471	1.02466e+06	367849	675445	732397
TNNT3	C9JCA5	Troponin T, fast skeletal muscle (Fragment)	3	145.16	400212	1.26673e+06	970205	4.64395e+06	1.42462e+06	1.08566e+06	1.71783e+06	2.65829e+06
